# Supplementary material for: Effect of Aging on the Immune Response to Core Vaccines in Senior and Geriatric Dogs
Source: MDPI journal article supplement (doi:10.3390/vetsci10070412), 2023-06-23

Table S1 - Dog's physiological age in human years based on its size [12]

| AGE (years) | DOG'S PHYSIOLOGICAL AGE IN HUMAN YEARS |          |          |        |
|-------------|----------------------------------------|----------|----------|--------|
|             | DOG'S SIZE                             |          |          |        |
|             | ≤9 kg                                  | 10-22 kg | 23-41 kg | >41 kg |
| 1           | 15                                     | 15       | 15       | 15     |
| 2           | 24                                     | 24       | 24       | 24     |
| 3           | 28                                     | 28       | 30       | 32     |
| 4           | 32                                     | 33       | 35       | 37     |
| 5           | 36                                     | 37       | 40       | 42     |
| 6           | 40                                     | 42       | 45       | 49     |
| 7           | 44                                     | 47       | 50       | 56     |
| 8           | 48                                     | 51       | 55       | 64     |
| 9           | 52                                     | 56       | 61       | 71     |
| 10          | 56                                     | 60       | 66       | 78     |
| 11          | 60                                     | 65       | 72       | 86     |
| 12          | 64                                     | 69       | 77       | 93     |
| 13          | 68                                     | 74       | 82       | 101    |
| 14          | 72                                     | 78       | 88       | 108    |
| 15          | 76                                     | 83       | 93       | 115    |
| 16          | 80                                     | 87       | 99       | 123    |
| 17          | 84                                     | 92       | 104      | --     |
| 18          | 88                                     | 96       | 109      | --     |
| 19          | 92                                     | 101      | 115      | --     |
| 20          | 96                                     | 105      | 120      | --     |

Table S2 - VacciCheck: correspondence between S scale units and antibody titers, sensitivity, and specificity for Canine Parvovirus type 2 (CPV-2), Canine Distemper Virus (CDV), and Canine Adenovirus type 1 (CAv-1)

|                        | CPV-2 (%)   | CDV (%)     | CAv-1 (%)   |
|------------------------|-------------|-------------|-------------|
| S0                     | <1:20       | <1:8        | <1:4        |
| S1                     | 1:20        | 1:8         | 1:4         |
| S2                     | 1:40        | 1:16        | 1:8         |
| <b>S3 (threshold)</b>  | <b>1:80</b> | <b>1:32</b> | <b>1:16</b> |
| S4                     | 1:160       | 1:64        | 1:32        |
| S5                     | 1:320       | 1:128       | 1:64        |
| S6                     | 1:640       | 1:256       | 1:128       |
| >S6                    | >1:640      | >1:256      | >1:128      |
| <i>Sensitivity (%)</i> | <i>88</i>   | <i>100</i>  | <i>94</i>   |
| <i>Specificity (%)</i> | <i>100</i>  | <i>92</i>   | <i>93</i>   |

**Table S3 - Classification of protection categories for Canine Parvovirus type 2 (CPV-2), Canine Distemper Virus (CDV), and Canine Adenovirus type 1 (CAdV-1) based on antibody titers of VacciCheck**

| <b>Categories</b> | <b>CPV-2</b>   | <b>CDV</b>    | <b>CAdV-1</b> |
|-------------------|----------------|---------------|---------------|
| Unprotected       | <1:20          | <1:8          | <1:4          |
| Weak Positive     | ≥1:20 to <1:80 | ≥1:8 to <1:32 | ≥1:4 to <1:16 |
| Medium Positive   | ≥1:80*-<1:160  | ≥1:32*-<1:64  | ≥1:16*-<1:32  |
| High Positive     | ≥1:160         | ≥1:64         | ≥1:32         |

\* Titers with asterisk represent threshold values

**Figure S1 Specific antibody titers for Canine Parvovirus type 2 (CPV-2), Canine Distemper Virus (CDV), and Canine Adenovirus type 1 (CAAdV-1) in the 350 ageing dogs**  
(titers with asterisk (\*) represent the threshold values)

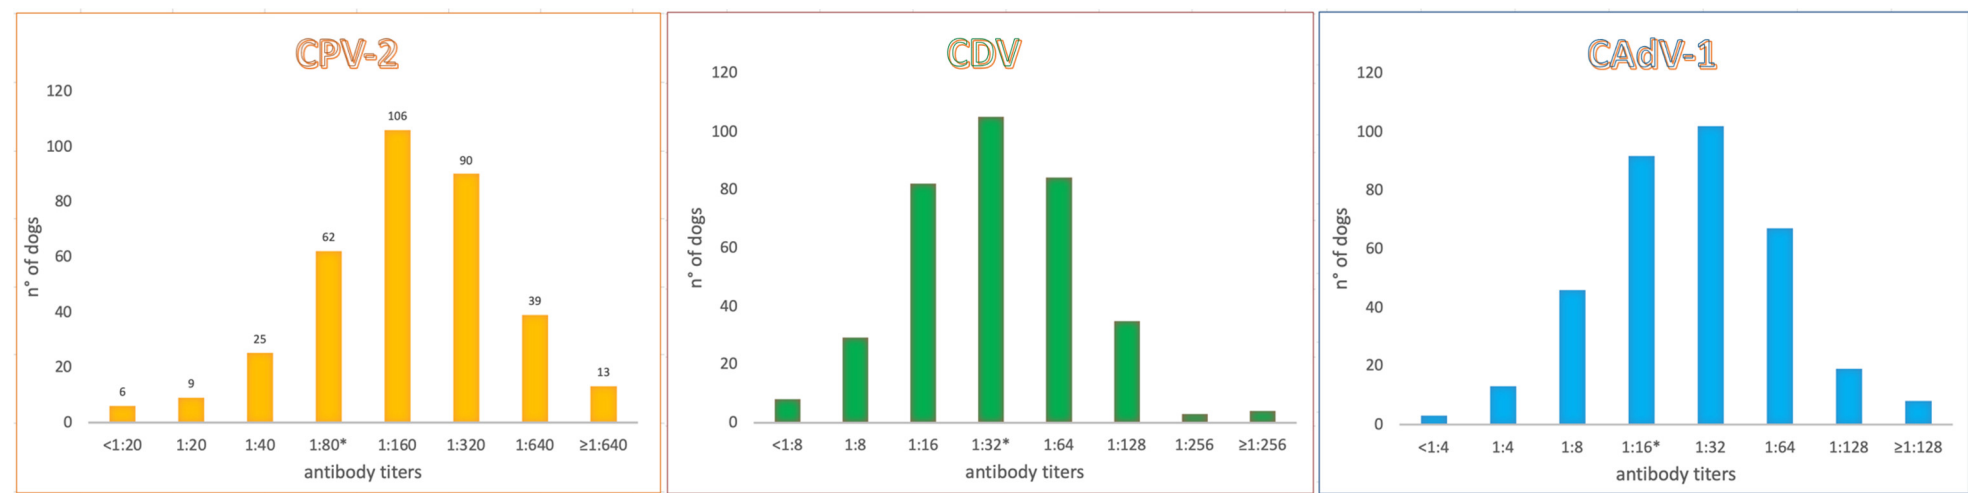

Supplement: s1 [file s1]
